# Supplementary material
Source: PubMed Central journal article supplement (PMC11541621)
Supplement: media-1.pdf [file media-1.pdf]

## Supplemental Table Captions:

**Supplemental Table 1.** Genes differentially expressed in response to FN-f treatment.

The direction of response is indicated with “-”, meaning downregulated, and “+”, meaning upregulated. The most significant genes with the largest effects (adjusted p-value < 0.01 and absolute log<sub>2</sub> fold change > 2) are denoted with “---” and “+++”.

symbol: gene symbol

gene\_id: gene ENSEMBL ID

padj: adjusted p-value

log<sub>2</sub>FoldChange: log<sub>2</sub> fold change of FN-f expression relative to PBS

FNf response: direction of gene response to FN-f

**Supplemental Table 2.** All GO terms and KEGG pathways that are enriched in FN-f upregulated and downregulated genes.

Tables are split by GO/KEGG and Upregulated/Downregulated.

GO term columns:

TermID: GO term ID

Term: GO term name

parentTermID: GO parent term ID as determined by string similarity

parentTerm: GO parent term name as determined by string similarity

Enrichment: enrichment score

-log<sub>10</sub>pval: -log<sub>10</sub> p-value of the GO term enrichment

Genes in Term: number of genes in that GO term

Target Genes in Term: number of genes in that term from the gene set of interest

Fraction of Targets in Term: Target Genes in Term/Total Target Genes

Total Target Genes: Number of target genes tested. This number will be the same within each dataset.

Total Genes: Number of total genes used for GO enrichment analysis. This number will be the same within each dataset.

Gene Symbols: The gene symbols of all the target genes identified with a GO term.

KEGG pathway columns:

TermID: KEGG pathway ID

Term: KEGG pathway name

Enrichment: enrichment score

-log<sub>10</sub>pval: -log<sub>10</sub> p-value of the KEGG pathway enrichment

Genes in Term: number of genes in that KEGG pathway

Target Genes in Term: number of genes in that term from the gene set of interest

Fraction of Targets in Term: Target Genes in Term/Total Target Genes

Total Target Genes: Number of target genes tested. This number will be the same within each dataset.

Total Genes: Number of total genes used for KEGG enrichment analysis. This number will be the same within each dataset.

Gene Symbols: The gene symbols of all the target genes identified with a KEGG pathway.

**Supplemental Table 3. Sex-specific genes.**

symbol: gene symbol

gene\_id: ENSEMBL gene ID

sex\_padj\_PBS: adjusted p-value of sex-specific gene in PBS

sex\_log2FoldChange\_PBS: log2 fold change (M/F) of gene in PBS

sex\_padj\_FNF: adjusted p-value of sex-specific gene in FN-f

sex\_log2FoldChange\_FNF: log2 fold change(M/F) of gene in FN-f

M/F: column indicating whether the gene is male-biased (M) or female-biased (F)

FNF response: direction of response of sex-specific gene to FN-f treatment. A missing value indicates the gene was not differentially expressed with FN-f. “+++”: high-effect FN-f upregulation; “+”: FN-f upregulation; “---”: high-effect FN-f downregulation; “-”: FN-f downregulation.

Change with OA: direction of expression of sex-specific gene in OA tissue. A missing value indicates the gene was not significantly expressed in OA.

OA study: the OA study the sex-specific gene was identified in, if applicable.

**Supplemental Table 4. Sex-specific gene expression in multiple tissues.**

This table corresponds to the heatmap in Fig 2B.

tissue\_no: The number column a tissue corresponds to in the heatmap, from left to right

tissue: tissue/cell type name

gene\_no: The number row a gene corresponds to in the heatmap, from top to bottom

sex: The sex the gene is associated with.

effsize: Effect size, log2 fold change

effsize\_se: Standard error of effect size

**Supplemental Table 5. Age-related genes.**

symbol: gene symbol

gene\_id: gene ENSEMBL ID

age\_padj\_PBS: adjusted p-value of age LRT in PBS

age\_padj\_FNF: adjusted p-value of age LRT in FN-f

Change with age: direction of expression change with older donors

FNF response: direction of response of age-related gene to FN-f treatment. A missing value indicates the gene was not differentially expressed with FN-f. “+++”: high-effect FN-f upregulation; “+”: FN-f upregulation; “---”: high-effect FN-f downregulation; “-”: FN-f downregulation.

Change with OA: direction of expression of age-related gene in OA tissue. A missing value indicates the gene was not significantly expressed in OA.

OA study: the OA study the age-related gene was identified in, if applicable.

**Supplemental Table 6. All GO terms that are enriched in genes that increase and decrease in expression with age.**

Tables are split by Up with Age/Down with Age.

TermID: GO term ID

Term: GO term name

parentTermID: GO parent term ID as determined by string similarity

parentTerm: GO parent term name as determined by string similarity  
Enrichment: enrichment score  
-log10pval: -log10 p-value of the GO term enrichment  
Genes in Term: number of genes in that GO term  
Target Genes in Term: number of genes in that term from the gene set of interest  
Fraction of Targets in Term: Target Genes in Term/Total Target Genes  
Total Target Genes: Number of target genes tested. This number will be the same within each dataset.  
Total Genes: Number of total genes used for GO enrichment analysis. This number will be the same within each dataset.  
Gene Symbols: The gene symbols of all the target genes identified with a GO term.

**Supplemental Table 7.** PBS and FN-f lead eQTLs and eGenes.

Conditionally independent lead eSNP-eGene pairs, separated by condition.

gene\_id: eGene ENSEMBL ID  
gene\_name: eGene name  
gene\_chr: gene chromosome  
gene\_tss: gene transcription start site used for eQTL mapping, as defined in Methods  
gene\_end: gene end  
gene\_strand: gene strand  
num\_cis\_variants: number of genetic variants that were *in cis* and tested for a gene  
rsID: lead eSNP rsID  
variantID: lead eSNP variant ID in the format “variant chromosome:variant position: allele 1: allele 2”  
variant pos: lead eSNP position  
beta: beta estimate of effect size  
beta\_se: standard error of calculated beta  
nom\_pval: nominal p-value  
minor\_allele: the minor allele, also the assessed or effect allele, for the lead eSNP. Beta estimates are relative to this allele.  
MAF: minor allele frequency  
eGene\_nominal\_threshold: the local nominal p-value significance threshold for an eGene  
eGene\_qval: the globally adjusted q-value for an eGene based on permutation testing  
signal: iteration of conditional analysis. 0 = primary signal, 1 = secondary signal, etc.

**Supplemental Table 8.** Study comparisons to Steinberg et al.

eGenes and lead variants:

Comparison of eGenes and lead variants between Steinberg et al. low grade and high grade cartilage eQTL datasets and current study PBS and FN-f eQTL datasets. Steinberg et al. variant coordinates were lifted over to hg38 to match the current study. All variant IDs are in the format “chr:hg38pos:ref:alt”.

gene\_id: eGene ENSEMBL ID  
gene\_symbol: eGene name

variantID\_Kramer\_PBS: lead variant ID for primary eGene signal in PBS eQTL dataset  
variantID\_Kramer\_FNF: lead variant ID for primary eGene signal in FN-f eQTL dataset  
variantID\_Steinberg\_lowgrade: lead variant ID for eGene in Steinberg low grade cartilage dataset  
variantID\_Steinberg\_highgrade: lead variant ID for eGene in Steinberg high grade cartilage dataset  
study: Which study the eGene was identified in: Kramer, Steinberg, or both

#### Study Designs:

Overview of current eQTL study and Steinberg et al. OA eQTL study datasets, including sample demographics, cartilage joint site, RNA-sequencing library preparation, genotyping platform, quality control, SNP imputation, eQTL calling methods, and colocalization methods.

HWE, Hardy-Weinberg Equilibrium; MAF, minor allele frequency; HRC, Haplotype Reference Consortium; PC, principal component; FDR, false discovery rate; GWAS, genome-wide association study; PP4, posterior probability 4 obtained from coloc

#### **Supplemental Table 9.** Condition-specific eQTLs in PBS and FN-f.

All lead eSNP-eGene pairs with a significant genotype by condition interaction effect. High confidence PBS-specific and FN-f-specific eQTLs are denoted by the “high\_conf” column.

gene\_id: eGene ENSEMBL ID

gene\_name: eGene name

gene\_chr: gene chromosome

gene\_tss: gene transcription start site used for eQTL mapping, as defined in Methods

gene\_end: gene end

gene\_strand: gene strand

rsID: lead eSNP rsID

variantID: lead eSNP variant ID in the format “variant chromosome:variant position: allele 1: allele 2”

variant\_pos: lead eSNP position

PBS\_beta: beta estimated effect size of lead eSNP-eGene in PBS

PBS\_beta\_se: standard error of calculated beta in PBS

FNF\_beta: beta estimated effect size of lead eSNP-eGene in FN-f

FNF\_beta\_se: standard error of calculated beta in FN-f

minor\_allele: the minor allele, also the assessed or effect allele, for the lead eSNP. Beta estimates are relative to this allele.

MAF: minor allele frequency

interaction\_pval: p-value from ANOVA testing of genotype by condition interaction

high\_conf: a column indicating whether the eQTL was high confidence condition-specific. A missing value indicates it is not part of this group.

#### **Supplemental Table 10.** KEGG pathways enriched in high-confidence PBS-specific and high-confidence FN-f-response eGenes.

TermID: KEGG pathway ID

Term: KEGG pathway name

Enrichment: enrichment score

$-\log_{10}pval$ :  $-\log_{10}$  p-value of the KEGG pathway enrichment

Genes in Term: number of genes in that KEGG pathway

Target Genes in Term: number of genes in that term from the gene set of interest

Fraction of Targets in Term: Target Genes in Term/Total Target Genes

Total Target Genes: Number of target genes tested. This number will be the same within each dataset.

Total Genes: Number of total genes used for KEGG enrichment analysis. This number will be the same within each dataset.

Gene Symbols: The gene symbols of all the target genes identified with a KEGG pathway.

**Supplemental Table 11.** Differential accessible peaks.

chrom: chromosome

start: peak start

end: peak end

width: peak width

baseMean: base mean of peak counts

log2FoldChange: log2 fold change of accessibility in FN-f relative to PBS

lfcSE: standard error of log2 fold change

padj: adjusted p-value

**Supplemental Table 12.** Differential loops.

chrom1: chromosome of loop anchor 1

start1: start of loop anchor 1

end1: end of loop anchor 1 (10 kb from start1)

chrom2: chromosome of loop anchor 2

start2: start of loop anchor 2

end2: end of loop anchor 2 (10 kb from start2)

log2FoldChange: log2 fold change of loop contact frequency in FN-f relative to PBS

lfcSE: standard error of log2 fold change

padj: adjusted p-value

cluster: looping cluster, either gained or lost with FN-f treatment

DonorX\_XXX\_rX\_raw: raw loop counts for a given donor sample (1-4), replicate (r1 or r2), and treatment condition (PBS or FNF)

**Supplemental Table 13.** Extended characterization of colocalizations between PBS and FN-f eQTL and OA GWAS signals.

OA, osteoarthritis; GWAS, Genome-wide association study; THR, Total Hip Replacement; OR, odds ratio; PBS coloc PP4, posterior probability 4 obtained from coloc testing with the PBS signal for an eQTL; FN-f coloc PP4, posterior probability 4 obtained from coloc testing with the FN-f signal for an eQTL; M vs F, male vs female

**Supplemental Table 14.** Donor characteristics for all collected datasets.

Ancestries for eQTL-related donors (i.e. genotyping and RNA-seq) were determined from principal component analysis with 1000 Genomes samples using EIGENSTRAT. Definitions of ancestry superpopulations are defined by 1000 Genomes.

AFR, African; AMR, Admixed American; EAS, East Asian; EUR, European; SAS, South Asian
